# Supplementary material for: Harnessing Natural Recovery Processes to Improve Restoration Outcomes: An Experimental Assessment of Sponge-Mediated Coral Reef Restoration
Source: PubMed Central journal article supplement (PMC3672152; doi:10.1371/journal.pone.0064945), 2013-06-04
Supplement: pone.0064945.s001.pdf [file pone.0064945.s001.pdf]

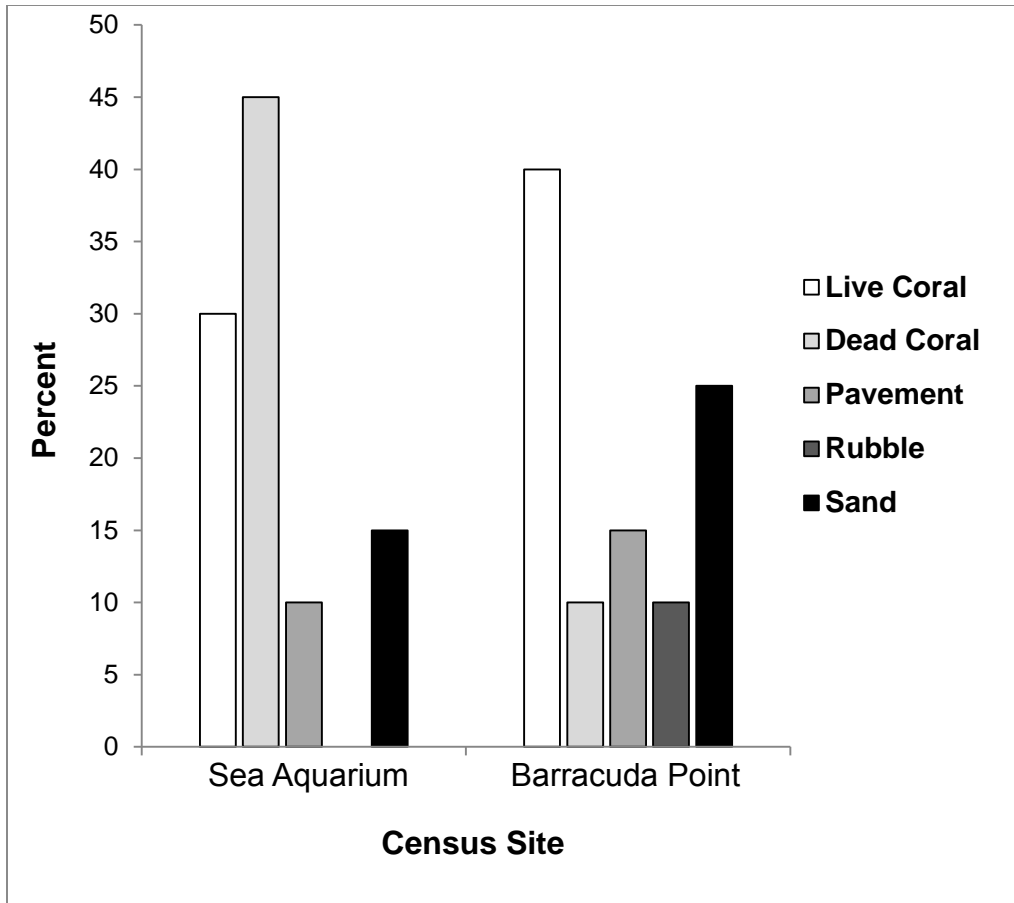

**Figure S1: Proportional representation of substratum type by reef study site.**
