# Supplementary material for: Harnessing Natural Recovery Processes to Improve Restoration Outcomes: An Experimental Assessment of Sponge-Mediated Coral Reef Restoration
Source: PubMed Central journal article supplement (PMC3672152; doi:10.1371/journal.pone.0064945), 2013-06-04
Supplement: pone.0064945.s003.pdf [file pone.0064945.s003.pdf]

**Table S1. Proportional representation of coral species by site.**

| Family         | Species                          | Morphology | Sea Aquarium |           | Barracuda Point |           |
|----------------|----------------------------------|------------|--------------|-----------|-----------------|-----------|
|                |                                  |            | N            | % Total N | N               | % Total N |
| Acroporidae    | <i>Acropora palmata</i>          | Branching  | 0            | 0         | 1               | 2.1       |
| Agariciidae    | <i>Agaricia agaricites</i>       | Leafy      | 4            | 8.7       | 5               | 10.4      |
| Astrocoeniidae | <i>Madracis mirabilis</i>        | Fingers    | 7            | 15.2      | 5               | 10.4      |
| Faviidae       | <i>Colpophyllia natans</i>       | Massive    | 4            | 8.7       | 3               | 6.3       |
|                | <i>Diploria labyrinthiformis</i> | Massive    | 1            | 2.2       | 1               | 2.1       |
|                | <i>Diploria strigosa</i>         | Massive    | 4            | 8.7       | 3               | 6.3       |
|                | <i>Montastraea annularis</i>     | Massive    | 4            | 8.7       | 6               | 12.5      |
|                | <i>Montastraea cavernosa</i>     | Massive    | 5            | 10.9      | 9               | 18.8      |
|                | <i>Montastraea faveolata</i>     | Massive    | 3            | 6.5       | 2               | 4.2       |
|                | <i>Solenastrea bournoni</i>      | Massive    | 1            | 2.2       | 0               | 0         |
| Meandrinidae   | <i>Dendrogyra cylindrus</i>      | Massive    | 2            | 4.3       | 0               | 0         |
|                | <i>Eusmilia fastigiata</i>       | Fingers    | 3            | 6.5       | 2               | 4.2       |
|                | <i>Meandrina meandrites</i>      | Massive    | 1            | 2.2       | 1               | 2.1       |
| Poritidae      | <i>Porites astreoides</i>        | Massive    | 1            | 2.2       | 2               | 4.2       |
|                | <i>Porites porites</i>           | Fingers    | 3            | 6.5       | 0               | 0         |
| Siderastreidae | <i>Siderastrea siderea</i>       | Massive    | 3            | 6.5       | 8               | 16.7      |
| <b>Total</b>   |                                  |            | 46           | 100       | 48              | 100       |
