# Supplementary material for: Harnessing Natural Recovery Processes to Improve Restoration Outcomes: An Experimental Assessment of Sponge-Mediated Coral Reef Restoration
Source: PubMed Central journal article supplement (PMC3672152; doi:10.1371/journal.pone.0064945), 2013-06-04
Supplement: pone.0064945.s004.pdf [file pone.0064945.s004.pdf]

**Table S2. Proportional representation of coral morphological groups by site.**

| <b>Morphology</b> | <b>Sea Aquarium</b> |                  | <b>Barracuda Point</b> |                  |
|-------------------|---------------------|------------------|------------------------|------------------|
|                   | <b>N</b>            | <b>% Total N</b> | <b>N</b>               | <b>% Total N</b> |
| Branching         | 0                   | 0                | 1                      | 2.1              |
| Fingers           | 13                  | 28.3             | 7                      | 14.6             |
| Leafy             | 4                   | 8.7              | 5                      | 10.4             |
| Massive           | 29                  | 63               | 35                     | 72.9             |
| <b>Total</b>      | <b>46</b>           | <b>100</b>       | <b>48</b>              | <b>100</b>       |
