# Supplementary material for: Harnessing Natural Recovery Processes to Improve Restoration Outcomes: An Experimental Assessment of Sponge-Mediated Coral Reef Restoration
Source: PubMed Central journal article supplement (PMC3672152; doi:10.1371/journal.pone.0064945), 2013-06-04
Supplement: pone.0064945.s005.pdf [file pone.0064945.s005.pdf]

**Table S3: Rubble pile consolidation over time by treatment and site.**

| Site            | Period<br>(month) | G-test of Independence |          |              |
|-----------------|-------------------|------------------------|----------|--------------|
|                 |                   | <i>df</i>              | <i>G</i> | <i>p</i>     |
| Sea Aquarium    | 12                | 1                      | 2.873    | 0.09         |
|                 | 24                | 1                      | 7.609    | <b>0.006</b> |
|                 | 36                | 1                      | 6.443    | <b>0.011</b> |
|                 | 48                | 1                      | 4.348    | <b>0.037</b> |
| Barracuda Point | 12                | 1                      | 0        | 1            |
|                 | 21                | 1                      | 7.648    | <b>0.006</b> |
|                 | 33                | 1                      | 8.424    | <b>0.004</b> |
|                 | 45                | 1                      | 6.661    | <b>0.009</b> |
