# Supplementary material for: Harnessing Natural Recovery Processes to Improve Restoration Outcomes: An Experimental Assessment of Sponge-Mediated Coral Reef Restoration
Source: PubMed Central journal article supplement (PMC3672152; doi:10.1371/journal.pone.0064945), 2013-06-04
Supplement: pone.0064945.s006.pdf [file pone.0064945.s006.pdf]

**Table S4. Sponge tissue replacement (PVR) over 15 months.**

| <b>Sponge Species</b>       | <b>Individuals</b> |            | <b>Volume</b>                   |                                  | <b>PVR (%)</b> | <b>Grouping (p&lt;0.05)</b> |
|-----------------------------|--------------------|------------|---------------------------------|----------------------------------|----------------|-----------------------------|
|                             | <b>(N)</b>         | <b>(%)</b> | <b>Excised (cm<sup>3</sup>)</b> | <b>Replaced (cm<sup>3</sup>)</b> |                |                             |
| <i>Aplysina cauliformis</i> | 29                 | 48.3       | 12.7 (5.8)                      | 17.7 (17.4)                      | 150.9 (124.5)  | A                           |
| <i>Aplysina</i> sp.         | 34                 | 57.6       | 38.1 (13.9)                     | 60.8 (41.5)                      | 171.1 (116.9)  | A                           |
| <i>Niphates erecta</i>      | 39                 | 63.9       | 33.1 (27.7)                     | 18.3 (13.4)                      | 71.0 (62.28)   | B                           |
